# Supplementary material for: Endocannabinoids, endocannabinoid-like compounds and cortisone in head hair of health care workers as markers of stress and resilience during the early COVID-19 pandemic
Source: Springer Nature journal article supplement (doi:10.1038/s41398-024-02771-9), 2024-01-31
Supplement: MOESM1 [file 41398_2024_2771_MOESM1_ESM.pdf]

|                                                                                                                                                                                                                                                          | Gar nicht |   |   |   | Sehr |
|----------------------------------------------------------------------------------------------------------------------------------------------------------------------------------------------------------------------------------------------------------|-----------|---|---|---|------|
|                                                                                                                                                                                                                                                          |           |   |   |   |      |
| <b>I. Stress / Angst</b>                                                                                                                                                                                                                                 |           |   |   |   |      |
| 1. Wie besorgt sind Sie aktuell, dass Sie an COVID-19 erkranken?                                                                                                                                                                                         | 0         | 1 | 2 | 3 | 4    |
| 2. Wie besorgt waren Sie in den vergangenen 2 Wochen um Ihre Gesundheit aufgrund der COVID-19-Pandemie?                                                                                                                                                  | 0         | 1 | 2 | 3 | 4    |
| 3. Wie hoffnungsvoll haben Sie sich in den vergangenen 2 Wochen gefühlt, dass die Corona-Krise bald ein Ende hat?                                                                                                                                        | 0         | 1 | 2 | 3 | 4    |
| 4. Wie sehr haben Sie sich in den vergangenen 2 Wochen aufgrund der COVID-19-Pandemie gestresst bzw. belastet gefühlt?                                                                                                                                   | 0         | 1 | 2 | 3 | 4    |
| <b>II. Änderung des Verhaltens</b>                                                                                                                                                                                                                       |           |   |   |   |      |
| 1. Wie sehr haben Sie aufgrund der COVID-19-Pandemie in den vergangenen 2 Wochen die empfohlene Maßnahme, Sozialkontakte zu reduzieren, befolgt?                                                                                                         | 0         | 1 | 2 | 3 | 4    |
| 2. Wie sehr haben Sie aufgrund der COVID-19-Pandemie in den vergangenen 2 Wochen die empfohlenen Hygienevorschriften befolgt?                                                                                                                            | 0         | 1 | 2 | 3 | 4    |
| 3. Wie sehr haben Sie aufgrund der COVID-19-Pandemie in den vergangenen 2 Wochen die Maßnahme der Ausgangsbeschränkungen befolgt?                                                                                                                        | 0         | 1 | 2 | 3 | 4    |
| <b>III. Auswirkungen der Coronavirus-Pandemie auf die psychische Gesundheit</b>                                                                                                                                                                          |           |   |   |   |      |
| 1. Wie sehr haben Sie aufgrund der COVID-19-Pandemie in den vergangenen 2 Wochen an Ein- und Durchschlafstörungen oder frühmorgentlichem Erwachen gelitten?                                                                                              | 0         | 1 | 2 | 3 | 4    |
| 2. Wie sehr haben Sie aufgrund der COVID-19-Pandemie in den vergangenen 2 Wochen unter Angst- und Paniktattacken mit körperlichen Symptomen (z.B. Herzklopfen, Brustschmerzen, Schwindel) gelitten?                                                      | 0         | 1 | 2 | 3 | 4    |
| 3. Wie sehr haben Sie in den vergangenen 2 Wochen mit sich aufdrängenden Bildern, Erinnerungen oder Alpträumen über die COVID-19-Pandemie zu kämpfen gehabt?                                                                                             | 0         | 1 | 2 | 3 | 4    |
| 4. Wie sehr haben Sie aufgrund der COVID-19-Pandemie in den vergangenen 2 Wochen einen übermäßig starken Drang verspürt, sich immer wieder die Hände zu waschen und/oder zu desinfizieren, damit Sie nicht von Verschmutzungen oder Keimen krank werden? | 0         | 1 | 2 | 3 | 4    |
| <b>IV. Umgang mit der Coronavirus-Pandemie</b>                                                                                                                                                                                                           | Gar nicht |   |   |   | Sehr |
| 1. Ich neige dazu, mich nach schwierigen Zeiten schnell zu erholen.                                                                                                                                                                                      | 1         | 2 | 3 | 4 | 5    |
| 2. Es fällt mir schwer, stressige Situationen zu überstehen.                                                                                                                                                                                             | 5         | 4 | 3 | 2 | 1    |
| 3. Ich brauche nicht viel Zeit, um mich von einem stressigen Ereignis zu erholen.                                                                                                                                                                        | 1         | 2 | 3 | 4 | 5    |
| 4. Es fällt mir schwer zur Normalität zurückzukehren, wenn etwas Schlimmes passiert ist.                                                                                                                                                                 | 5         | 4 | 3 | 2 | 1    |
| 5. Normalerweise überstehe ich schwierige Zeiten ohne größere Probleme.                                                                                                                                                                                  | 1         | 2 | 3 | 4 | 5    |
| 6. Ich brauche tendenziell lange, um über Rückschläge in meinem Leben hinwegzukommen.                                                                                                                                                                    | 5         | 4 | 3 | 2 | 1    |

|                                                                                                                                                                              | Not agree |   |   |   | Totally agree |
|------------------------------------------------------------------------------------------------------------------------------------------------------------------------------|-----------|---|---|---|---------------|
| <b>I. Stress/anxiety</b>                                                                                                                                                     |           |   |   |   |               |
| 1. Please indicate how likely you think it is that you will be infected with COVID-19                                                                                        | 0         | 1 | 2 | 3 | 4             |
| 2. How afraid have you been for the last 14 days for your health because of the COVID-19 pandemic?                                                                           | 0         | 1 | 2 | 3 | 4             |
| 3. How hopeful have you been the last 14 days that the COVID-19 pandemic is soon over?                                                                                       | 0         | 1 | 2 | 3 | 4             |
| 4. Because of the COVID-19 pandemic I was very stressed over the past 14 days?                                                                                               | 0         | 1 | 2 | 3 | 4             |
| <b>II. Adhering the rules:</b>                                                                                                                                               |           |   |   |   |               |
| 1. Over the last 14 days, I obeyed the reduction of social contacts as recommended?                                                                                          | 0         | 1 | 2 | 3 | 4             |
| 2. Over the last 14 days, I obeyed the hygiene measures as recommended?                                                                                                      | 0         | 1 | 2 | 3 | 4             |
| 3. Over the last 14 days, I obeyed the curfew?                                                                                                                               | 0         | 1 | 2 | 3 | 4             |
| <b>III. Impact of the psychological health:</b>                                                                                                                              |           |   |   |   |               |
| Over the last 14 days, I suffered from problems, such as difficulty falling asleep, difficulty sleeping through the night or early morning awakening                         | 0         | 1 | 2 | 3 | 4             |
| Over the last 14 days, I suffered from unforeseeable severe anxiety attacks (panic) with physical symptoms (e.g. palpitations, chest pain, dizziness).                       | 0         | 1 | 2 | 3 | 4             |
| Over the last 14 days, I suffered from upsetting dreams that replay part of the experience of the COVID-19 pandemic or are clearly related to it                             | 0         | 1 | 2 | 3 | 4             |
| Over the last 14 days, I suffered from the excessive urge to wash and/or disinfect my hands again and again so that I do not pass on germs or contamination to other people. | 0         | 1 | 2 | 3 | 4             |
| <b>IV: Resilience</b>                                                                                                                                                        |           |   |   |   |               |
| 1. I tend to bounce back quickly after hard times                                                                                                                            | 1         | 2 | 3 | 4 | 5             |
| 2. I have a hard time making it through stressful events                                                                                                                     | 5         | 4 | 3 | 2 | 1             |
| 3. It does not take me long to recover from a stressful event                                                                                                                | 1         | 2 | 3 | 4 | 5             |
| 4. It is hard for me to snap back when something bad happens                                                                                                                 | 5         | 4 | 3 | 2 | 1             |
| 5. I usually come through difficult times with little trouble                                                                                                                | 1         | 2 | 3 | 4 | 5             |
| 6. I tend to take a long time to get over set-backs in my life                                                                                                               | 5         | 4 | 3 | 2 | 1             |

Supplement 1: Questionnaire in original (as used) and with translation (not used and not entire validated)

Questionnaire with question-set I-IV for Visit 2, 3 and 4; for Visit 1 only the question-sets I-III were applied. Question-set I evaluates anxiety. The question 1 in question-set was not eligible as it asked for the momentary state, while all other questions refer to the situation 2 weeks ago and the hair data, accordingly. Question-set II is about adhering to the new COVID-19 rules. Question-set III is about the impact on the psychological health and question-set IV is the brief resilience scale.

Supplement 2: Mass Transition

| Analyt | Mass transition             | Internal Standard | Mass transition |
|--------|-----------------------------|-------------------|-----------------|
| AEA    | 348.2/62                    | AEA-d4            | 352.2/66        |
| 2-AG   | 379.2/287.2,<br>379.2/269.2 | 2AG-d5            | 384.2/287.2     |
| E      | 361.2/161.2                 | cortisone-d8      | 369.2/169.2     |
| PEA    | 300.2/62                    | PEA-d4            | 304.2/62        |
| OEA    | 326.2/62                    | OEA-d4            | 330.2/66        |
| SEA    | 328.2/62                    | SEA-d3            | 331/62          |

Supplement 2: Mass Transition for the measurement of the hormones

| <b>Supplement 3a: Model of Question I (anxiety)</b>  |                          |                  |                          |                  |                          |                  |
|------------------------------------------------------|--------------------------|------------------|--------------------------|------------------|--------------------------|------------------|
|                                                      | <b>Occupation</b>        |                  | <b>Ward</b>              |                  | <b>Covidward</b>         |                  |
| <i>Predictors</i>                                    | <i>Estimates</i>         | <i>p</i>         | <i>Estimates</i>         | <i>p</i>         | <i>Estimates</i>         | <i>p</i>         |
| (Intercept)                                          | 7.75<br>(6.79 – 8.72)    | <b>&lt;0.001</b> | 7.82<br>(6.85 – 8.79)    | <b>&lt;0.001</b> | 7.79<br>(6.75 – 8.84)    | <b>&lt;0.001</b> |
| Visit                                                | -0.67<br>(-0.81 – -0.54) | <b>&lt;0.001</b> | -0.68<br>(-0.81 – -0.54) | <b>&lt;0.001</b> | -0.67<br>(-0.81 – -0.54) | <b>&lt;0.001</b> |
| Age-Group: 20 to 29                                  | <i>Reference</i>         |                  | <i>Reference</i>         |                  | <i>Reference</i>         |                  |
| Age-Group: 30 to 39                                  | 0.72<br>(-0.12 – 156)    | 0.093            | 0.72<br>(-0.12 – 156)    | 0.092            | 0.78<br>(-0.06 – 162)    | 0.067            |
| Age-Group: 40 to 49                                  | 125<br>(0.30 – 2.20)     | <b>0.010</b>     | 119<br>(0.24 – 2.14)     | <b>0.014</b>     | 124<br>(0.28 – 2.19)     | <b>0.011</b>     |
| Age-Group: 50 to 59                                  | 151<br>(0.45 – 2.57)     | <b>0.005</b>     | 149<br>(0.43 – 2.55)     | <b>0.006</b>     | 152<br>(0.45 – 2.59)     | <b>0.006</b>     |
| Age-Group: 60 to 69                                  | -0.31<br>(-183 – 121)    | 0.690            | -0.32<br>(-183 – 119)    | 0.679            | -0.22<br>(-174 – 130)    | 0.779            |
| Gender: Male                                         | <i>Reference</i>         |                  | <i>Reference</i>         |                  | <i>Reference</i>         |                  |
| Gender: Female                                       | 0.49<br>(-0.27 – 126)    | 0.206            | 0.50<br>(-0.22 – 122)    | 0.176            | 0.45<br>(-0.28 – 118)    | 0.224            |
| Occupation: Physician                                | <i>Reference</i>         |                  | <i>Reference</i>         |                  | <i>Reference</i>         |                  |
| Occupation: Administration/Laboratory                | 0.90<br>(-0.11 – 191)    | 0.080            |                          |                  |                          |                  |
| Occupation: Nursing                                  | -0.29<br>(-1.11 – 0.53)  | 0.486            |                          |                  |                          |                  |
| Occupation: Others/Cleaning service                  | 1.21<br>(-0.33 – 2.75)   | 0.125            |                          |                  |                          |                  |
| Ward: Normal                                         | <i>Reference</i>         |                  | <i>Reference</i>         |                  | <i>Reference</i>         |                  |
| Ward: Administration/Laboratory                      |                          |                  | 0.91<br>(-0.03 – 184)    | 0.058            |                          |                  |
| Ward: Emergency/Endoscopy                            |                          |                  | -0.87<br>(-177 – 0.02)   | 0.055            |                          |                  |
| Ward: ICU                                            |                          |                  | 0.21<br>(-0.62 – 105)    | 0.616            |                          |                  |
| Covidward: No                                        | <i>Reference</i>         |                  | <i>Reference</i>         |                  | <i>Reference</i>         |                  |
| Covidward: Yes                                       |                          |                  |                          |                  | -0.23<br>(-0.99 – 0.52)  | 0.544            |
| Covidward: No Patient Contact                        |                          |                  |                          |                  | 0.91<br>(-0.06 – 187)    | 0.065            |
| <b>Random Effects</b>                                |                          |                  |                          |                  |                          |                  |
| $\sigma^2$                                           | 3.47                     |                  | 3.47                     |                  | 3.47                     |                  |
| $\tau_{00}$                                          | 3.67 <sub>Code</sub>     |                  | 3.61 <sub>Code</sub>     |                  | 3.72 <sub>Code</sub>     |                  |
| ICC                                                  | 0.51                     |                  | 0.51                     |                  | 0.52                     |                  |
| N                                                    | 178 <sub>Code</sub>      |                  | 178 <sub>Code</sub>      |                  | 178 <sub>Code</sub>      |                  |
| Observations                                         |                          | 625              |                          | 625              |                          | 625              |
| Marginal R <sup>2</sup> / Conditional R <sup>2</sup> | 0.151 / 0.587            |                  | 0.159 / 0.588            |                  | 0.144 / 0.587            |                  |

Models of question-set I in dependency of the occupation (column 1), ward (column 2) or COVID-19 ward (column 3). Model of question-set I (stress and anxiety): the age groups 40-49 and 50-59 had a significant higher stress level than than the age group 20-29, the stress level at the ward emergency and endoscopy were significant lower than at the normal ward

| Supplement 3b: Model of Question II (adhering the new COVID-19 rules) |                          |                  |                          |                  |                          |                  |
|-----------------------------------------------------------------------|--------------------------|------------------|--------------------------|------------------|--------------------------|------------------|
|                                                                       | Occupation               |                  | Ward                     |                  | Covidward                |                  |
| Predictors                                                            | Estimates                | p                | Estimates                | p                | Estimates                | p                |
| (Intercept)                                                           | 11.98<br>(11.32 – 12.64) | <b>&lt;0.001</b> | 11.73<br>(11.06 – 12.40) | <b>&lt;0.001</b> | 11.69<br>(10.97 – 12.40) | <b>&lt;0.001</b> |
| Visit                                                                 | -0.73<br>(-0.83 – -0.63) | <b>&lt;0.001</b> | -0.73<br>(-0.83 – -0.63) | <b>&lt;0.001</b> | -0.73<br>(-0.83 – -0.62) | <b>&lt;0.001</b> |
| Age-Group: 20 to 29                                                   | Reference                |                  | Reference                |                  | Reference                |                  |
| Age-Group: 30 to 39                                                   | 0.36<br>(-0.20 – 0.92)   | 0.210            | 0.37<br>(-0.20 – 0.94)   | 0.198            | 0.41<br>(-0.16 – 0.97)   | 0.158            |
| Age-Group: 40 to 49                                                   | 0.58<br>(-0.06 – 1.21)   | 0.076            | 0.55<br>(-0.09 – 1.20)   | 0.093            | 0.57<br>(-0.07 – 1.22)   | 0.082            |
| Age-Group: 50 to 59                                                   | 0.66<br>(-0.05 – 1.38)   | 0.069            | 0.57<br>(-0.16 – 1.30)   | 0.123            | 0.59<br>(-0.14 – 1.31)   | 0.112            |
| Age-Group: 60 to 69                                                   | 1.51<br>(0.48 – 2.54)    | <b>0.004</b>     | 1.25<br>(0.21 – 2.29)    | <b>0.018</b>     | 1.29<br>(0.26 – 2.32)    | <b>0.014</b>     |
| Gender: Male                                                          | Reference                |                  | Reference                |                  | Reference                |                  |
| Gender: Female                                                        | 0.02<br>(-0.50 – 0.53)   | 0.946            | -0.16<br>(-0.65 – 0.34)  | 0.534            | -0.17<br>(-0.66 – 0.33)  | 0.510            |
| Occupation: Physician                                                 | Reference                |                  | Reference                |                  | Reference                |                  |
| Occupation: Administration/Laboratory                                 | 0.01<br>(-0.67 – 0.68)   | 0.988            |                          |                  |                          |                  |
| Occupation: Nursing                                                   | -0.57<br>(-1.12 – -0.01) | <b>0.044</b>     |                          |                  |                          |                  |
| Occupation: Others/Cleaning service                                   | -0.96<br>(-2.00 – 0.08)  | 0.069            |                          |                  |                          |                  |
| Ward: Normal                                                          | Reference                |                  | Reference                |                  | Reference                |                  |
| Ward: Administration/Laboratory                                       |                          |                  | 0.48<br>(-0.16 – 1.12)   | 0.139            |                          |                  |
| Ward: Emergency/Endoscopy                                             |                          |                  | -0.26<br>(-0.87 – 0.35)  | 0.402            |                          |                  |
| Ward: ICU                                                             |                          |                  | 0.14<br>(-0.44 – 0.71)   | 0.638            |                          |                  |
| Covidward: No                                                         | Reference                |                  | Reference                |                  | Reference                |                  |
| Covidward: Yes                                                        |                          |                  |                          |                  | 0.01<br>(-0.50 – 0.52)   | 0.978            |
| Covidward: No Patient Contact                                         |                          |                  |                          |                  | 0.51<br>(-0.14 – 1.16)   | 0.127            |
| <b>Random Effects</b>                                                 |                          |                  |                          |                  |                          |                  |
| $\sigma^2$                                                            | 2.04                     |                  | 2.04                     |                  | 2.04                     |                  |
| $\tau_{00}$                                                           | 153 <sub>Code</sub>      |                  | 156 <sub>Code</sub>      |                  | 157 <sub>Code</sub>      |                  |
| ICC                                                                   | 0.43                     |                  | 0.43                     |                  | 0.43                     |                  |
| N                                                                     | 178 <sub>Code</sub>      |                  | 178 <sub>Code</sub>      |                  | 178 <sub>Code</sub>      |                  |
| Observations                                                          | 630                      |                  | 630                      |                  | 630                      |                  |
| Marginal R <sup>2</sup> / Conditional R <sup>2</sup>                  | 0.193 / 0.539            |                  | 0.186 / 0.539            |                  | 0.184 / 0.538            |                  |

Models of question-set II in dependency of the occupation (column 1), ward (column 2) or COVID-19 ward (column 3).

Model of question-set II (adhering the new COVID-19 rules): adherence to the new COVID-19 rules was significantly lower in nurses than in physicians and significant higher in the age group 60-69

| Supplement 3c: Model of Question III (psychological health) |                          |                  |                          |                  |                          |                  |
|-------------------------------------------------------------|--------------------------|------------------|--------------------------|------------------|--------------------------|------------------|
|                                                             | Occupation               |                  | Ward                     |                  | Covidward                |                  |
| Predictors                                                  | Estimates                | p                | Estimates                | p                | Estimates                | p                |
| (Intercept)                                                 | 2.20<br>(125 – 3.16)     | <b>&lt;0.001</b> | 2.53<br>(158 – 3.48)     | <b>&lt;0.001</b> | 2.43<br>(139 – 3.47)     | <b>&lt;0.001</b> |
| Visit                                                       | -0.39<br>(-0.51 – -0.26) | <b>&lt;0.001</b> | -0.40<br>(-0.52 – -0.27) | <b>&lt;0.001</b> | -0.39<br>(-0.51 – -0.26) | <b>&lt;0.001</b> |
| Age-Group: 20 to 29                                         | Reference                |                  | Reference                |                  | Reference                |                  |
| Age-Group: 30 to 39                                         | 0.47<br>(-0.37 – 131)    | 0.271            | 0.29<br>(-0.53 – 111)    | 0.490            | 0.45<br>(-0.39 – 129)    | 0.296            |
| Age-Group: 40 to 49                                         | 0.60<br>(-0.35 – 155)    | 0.216            | 0.51<br>(-0.42 – 144)    | 0.286            | 0.59<br>(-0.37 – 155)    | 0.225            |
| Age-Group: 50 to 59                                         | 1.58<br>(0.52 – 2.65)    | <b>0.004</b>     | 1.55<br>(0.50 – 2.59)    | <b>0.004</b>     | 1.63<br>(0.55 – 2.71)    | <b>0.003</b>     |
| Age-Group: 60 to 69                                         | -0.27<br>(-180 – 126)    | 0.732            | -0.31<br>(-180 – 118)    | 0.683            | -0.10<br>(-163 – 143)    | 0.896            |
| Gender: Male                                                | Reference                |                  | Reference                |                  | Reference                |                  |
| Gender: Female                                              | 0.80<br>(0.03 – 157)     | <b>0.041</b>     | 1.07<br>(0.36 – 178)     | <b>0.003</b>     | 1.02<br>(0.28 – 175)     | <b>0.007</b>     |
| Occupation: Physician                                       | Reference                |                  | Reference                |                  | Reference                |                  |
| Occupation: Administration/Laboratory                       | 0.83<br>(-0.18 – 185)    | 0.107            |                          |                  |                          |                  |
| Occupation: Nursing                                         | 0.55<br>(-0.27 – 137)    | 0.191            |                          |                  |                          |                  |
| Occupation: Others/Cleaning service                         | 1.25<br>(-0.29 – 2.80)   | 0.112            |                          |                  |                          |                  |
| Ward: Normal                                                | Reference                |                  | Reference                |                  | Reference                |                  |
| Ward: Administration/Laboratory                             |                          |                  | 0.38<br>(-0.54 – 131)    | 0.415            |                          |                  |
| Ward: Emergency/Endoscopy                                   |                          |                  | -0.91<br>(-179 – -0.04)  | <b>0.042</b>     |                          |                  |
| Ward: ICU                                                   |                          |                  | 0.72<br>(-0.10 – 155)    | 0.085            |                          |                  |
| Covidward: No                                               | Reference                |                  | Reference                |                  | Reference                |                  |
| Covidward: Yes                                              |                          |                  |                          |                  | 0.05<br>(-0.71 – 0.81)   | 0.887            |
| Covidward: No Patient Contact                               |                          |                  |                          |                  | 0.40<br>(-0.57 – 137)    | 0.419            |
| <b>Random Effects</b>                                       |                          |                  |                          |                  |                          |                  |
| $\sigma^2$                                                  | 2.99                     |                  | 2.99                     |                  | 2.99                     |                  |
| $\tau_{00}$                                                 | 3.86 <sub>Code</sub>     |                  | 3.61 <sub>Code</sub>     |                  | 3.92 <sub>Code</sub>     |                  |
| ICC                                                         | 0.56                     |                  | 0.55                     |                  | 0.57                     |                  |
| N                                                           | 178 <sub>Code</sub>      |                  | 178 <sub>Code</sub>      |                  | 178 <sub>Code</sub>      |                  |
| Observations                                                | 631                      |                  | 631                      |                  | 631                      |                  |
| Marginal R <sup>2</sup> / Conditional R <sup>2</sup>        | 0.111 / 0.611            |                  | 0.140 / 0.610            |                  | 0.101 / 0.611            |                  |

Models of question-set III in dependency of the occupation (column 1), ward (column 2) or COVID-19 ward (column 3).

Model of question-set III (impact of the psychological health): the impact was significantly higher for females than males and in the age group 50-59, but significantly lower in the emergency ward and endoscopy personnel.

| Supplement 3d: Model of Question IV (resilience)     |                          |                  |                          |                  |                          |                  |
|------------------------------------------------------|--------------------------|------------------|--------------------------|------------------|--------------------------|------------------|
|                                                      | Occupation               |                  | Ward                     |                  | Covidward                |                  |
| Predictors                                           | Estimates                | p                | Estimates                | p                | Estimates                | p                |
| (Intercept)                                          | 24.54<br>(22.90 – 26.8)  | <b>&lt;0.001</b> | 24.04<br>(22.36 – 25.73) | <b>&lt;0.001</b> | 23.43<br>(21.65 – 25.21) | <b>&lt;0.001</b> |
| Visit                                                | 0.04<br>(-0.19 – 0.27)   | 0.746            | 0.04<br>(-0.19 – 0.27)   | 0.732            | 0.04<br>(-0.19 – 0.27)   | 0.730            |
| Age-Group: 20 to 29                                  | Reference                |                  | Reference                |                  | Reference                |                  |
| Age-Group: 30 to 39                                  | -0.08<br>(-155 – 140)    | 0.920            | -0.04<br>(-152 – 145)    | 0.962            | 0.01<br>(-144 – 147)     | 0.985            |
| Age-Group: 40 to 49                                  | -0.36<br>(-2.03 – 130)   | 0.667            | -0.38<br>(-2.06 – 130)   | 0.654            | -0.43<br>(-2.09 – 123)   | 0.611            |
| Age-Group: 50 to 59                                  | -1.44<br>(-3.31 – 0.43)  | 0.131            | -1.47<br>(-3.37 – 0.43)  | 0.129            | -1.48<br>(-3.35 – 0.39)  | 0.121            |
| Age-Group: 60 to 69                                  | 0.66<br>(-199 – 3.31)    | 0.623            | 0.58<br>(-2.07 – 3.24)   | 0.666            | 0.60<br>(-2.02 – 3.22)   | 0.654            |
| Gender: Male                                         | Reference                |                  | Reference                |                  | Reference                |                  |
| Gender: Female                                       | -2.03<br>(-3.38 – -0.69) | <b>0.003</b>     | -2.38<br>(-3.66 – -1.11) | <b>&lt;0.001</b> | -2.29<br>(-3.56 – -1.02) | <b>&lt;0.001</b> |
| Occupation: Physician                                | Reference                |                  | Reference                |                  | Reference                |                  |
| Occupation: Administration/Laboratory                | -2.08<br>(-3.86 – -0.31) | <b>0.022</b>     |                          |                  |                          |                  |
| Occupation: Nursing                                  | -0.98<br>(-2.41 – 0.46)  | 0.181            |                          |                  |                          |                  |
| Occupation: Others/Cleaning service                  | -1.30<br>(-4.00 – 139)   | 0.343            |                          |                  |                          |                  |
| Ward: Normal                                         | Reference                |                  | Reference                |                  | Reference                |                  |
| Ward: Administration/Laboratory                      |                          |                  | -1.27<br>(-2.94 – 0.40)  | 0.136            |                          |                  |
| Ward: Emergency/Endoscopy                            |                          |                  | 0.10<br>(-149 – 169)     | 0.903            |                          |                  |
| Ward: ICU                                            |                          |                  | 0.13<br>(-135 – 161)     | 0.865            |                          |                  |
| Covidward: No                                        | Reference                |                  | Reference                |                  | Reference                |                  |
| Covidward: Yes                                       |                          |                  |                          |                  | 0.94<br>(-0.38 – 2.25)   | 0.161            |
| Covidward: No Patient Contact                        |                          |                  |                          |                  | -0.74<br>(-2.42 – 0.95)  | 0.390            |
| <b>Random Effects</b>                                |                          |                  |                          |                  |                          |                  |
| $\sigma^2$                                           | 4.31                     |                  | 4.32                     |                  | 4.32                     |                  |
| $\tau_{00}$                                          | 12.79 <sub>Code</sub>    |                  | 12.94 <sub>Code</sub>    |                  | 12.68 <sub>Code</sub>    |                  |
| ICC                                                  | 0.75                     |                  | 0.75                     |                  | 0.75                     |                  |
| N                                                    | 178 <sub>Code</sub>      |                  | 178 <sub>Code</sub>      |                  | 178 <sub>Code</sub>      |                  |
| Observations                                         | 488                      |                  | 488                      |                  | 488                      |                  |
| Marginal R <sup>2</sup> / Conditional R <sup>2</sup> | 0.114 / 0.777            |                  | 0.105 / 0.776            |                  | 0.113 / 0.775            |                  |

Models of question-set IV in dependency of the occupation (column 1), ward (column 2) or COVID-19 ward (column 3).

Model of question-set IV (resilience): the resilience was significantly lower in women than in men and in the occupation administration/laboratory workers than the physicians.

Supplement 4a: Linear Model at Visit 1 with Factorized Stress Score

|                                               | PEA                     |        | OEA                     |        | SEA                      |              | 2-AG                    |              | AEA                     |       |
|-----------------------------------------------|-------------------------|--------|-------------------------|--------|--------------------------|--------------|-------------------------|--------------|-------------------------|-------|
| Predictors                                    | Estimates               | p      | Estimates               | p      | Estimates                | p            | Estimates               | p            | Estimates               | p     |
| (Intercept)                                   | 7.83<br>(6.58–9.08)     | <0.001 | 8.25<br>(6.53–9.97)     | <0.001 | 7.93<br>(7.02–8.84)      | <0.001       | 4.10<br>(3.24–4.96)     | <0.001       | 0.28<br>(-1.11–1.66)    | 0.692 |
| Age-Group: 20 to 29                           | Reference               |        | Reference               |        | Reference                |              | Reference               |              | Reference               |       |
| Age-Group: 30 to 39                           | -0.04<br>(-0.31 – 0.22) | 0.757  | 0.00<br>(-0.36 – 0.36)  | 0.996  | -0.06<br>(-0.26 – 0.13)  | 0.510        | -0.06<br>(-0.25 – 0.12) | 0.481        | -0.18<br>(-0.49 – 0.14) | 0.268 |
| Age-Group: 40 to 49                           | -0.01<br>(-0.32 – 0.30) | 0.949  | -0.02<br>(-0.45 – 0.40) | 0.923  | -0.07<br>(-0.30 – 0.16)  | 0.540        | 0.00<br>(-0.21 – 0.22)  | 0.978        | -0.01<br>(-0.40 – 0.38) | 0.962 |
| Age-Group: 50 to 59                           | -0.13<br>(-0.46 – 0.21) | 0.461  | -0.18<br>(-0.64 – 0.28) | 0.444  | -0.03<br>(-0.27 – 0.22)  | 0.834        | 0.00<br>(-0.23 – 0.23)  | 0.988        | -0.01<br>(-0.40 – 0.38) | 0.965 |
| Age-Group: 60 to 69                           | -0.33<br>(-0.88 – 0.23) | 0.245  | -0.14<br>(-0.90 – 0.62) | 0.719  | -0.18<br>(-0.58 – 0.22)  | 0.373        | 0.06<br>(-0.32 – 0.44)  | 0.755        | -0.01<br>(-0.76 – 0.73) | 0.972 |
| Gender: Male                                  | Reference               |        | Reference               |        | Reference                |              | Reference               |              | Reference               |       |
| Gender: Female                                | 0.10<br>(-0.15 – 0.36)  | 0.431  | 0.04<br>(-0.31 – 0.40)  | 0.802  | -0.08<br>(-0.26 – 0.11)  | 0.402        | -0.08<br>(-0.26 – 0.09) | 0.349        | -0.01<br>(-0.35 – 0.33) | 0.954 |
| Occupation: Physician                         | Reference               |        | Reference               |        | Reference                |              | Reference               |              | Reference               |       |
| Occupation: Administration/Laboratory         | 0.13<br>(-0.21 – 0.47)  | 0.440  | 0.30<br>(-0.16 – 0.76)  | 0.204  | 0.06<br>(-0.18 – 0.31)   | 0.599        | 0.36<br>(0.13 – 0.59)   | <b>0.002</b> | 0.03<br>(-0.37 – 0.43)  | 0.881 |
| Occupation: Nursing                           | -0.01<br>(-0.28 – 0.25) | 0.917  | -0.02<br>(-0.38 – 0.35) | 0.930  | -0.10<br>(-0.29 – 0.09)  | 0.312        | 0.26<br>(0.08 – 0.44)   | <b>0.005</b> | 0.25<br>(-0.07 – 0.57)  | 0.118 |
| Occupation: Others/Cleaning service           | -0.23<br>(-0.87 – 0.40) | 0.468  | -0.24<br>(-1.11 – 0.64) | 0.592  | -0.08<br>(-0.54 – 0.38)  | 0.736        | 0.15<br>(-0.24 – 0.54)  | 0.458        | -0.45<br>(-1.23 – 0.33) | 0.253 |
| CovidContact: No                              | Reference               |        | Reference               |        | Reference                |              | Reference               |              | Reference               |       |
| CovidContact: Yes                             | -0.00<br>(-0.24 – 0.24) | 0.998  | 0.00<br>(-0.32 – 0.33)  | 0.990  | -0.03<br>(-0.20 – 0.14)  | 0.747        | 0.08<br>(-0.08 – 0.24)  | 0.330        | -0.13<br>(-0.41 – 0.15) | 0.372 |
| Visit 1 Stress / Anxiety: low stress          | Reference               |        | Reference               |        | Reference                |              | Reference               |              | Reference               |       |
| Visit 1 Stress / Anxiety: Stressed            | -0.21<br>(-0.44 – 0.03) | 0.090  | -0.22<br>(-0.54 – 0.11) | 0.189  | -0.23<br>(-0.40 – -0.06) | <b>0.010</b> | -0.08<br>(-0.24 – 0.08) | 0.320        | -0.13<br>(-0.43 – 0.16) | 0.366 |
| Visit 1 Adhering rules: Not Changed           | Reference               |        | Reference               |        | Reference                |              | Reference               |              | Reference               |       |
| Visit 1 adhering rules: Changed               | 0.02<br>(-1.14 – 1.18)  | 0.975  | -0.85<br>(-2.44 – 0.74) | 0.292  | 0.13<br>(-0.71 – 0.97)   | 0.758        | 0.67<br>(-0.12 – 1.47)  | 0.096        | 0.19<br>(-1.07 – 1.44)  | 0.769 |
| Visit 1 Effects of the Pandemic: Not Impacted | Reference               |        | Reference               |        | Reference                |              | Reference               |              | Reference               |       |
| Visit 1 Effects of the Pandemic: Impacted     | 0.37<br>(-0.08 – 0.83)  | 0.107  | 0.27<br>(-0.35 – 0.90)  | 0.385  | 0.04<br>(-0.31 – 0.39)   | 0.819        | -0.10<br>(-0.41 – 0.21) | 0.536        | -0.18<br>(-0.71 – 0.35) | 0.512 |
| Observations                                  | 122                     |        | 122                     |        | 122                      |              | 123                     |              | 99                      |       |
| R <sup>2</sup> / R <sup>2</sup> adjusted      | 0.099 / -0.019          |        | 0.069 / -0.053          |        | 0.108 / -0.009           |              | 0.148 / 0.038           |              | 0.117 / -0.030          |       |

Supplement 4a: Linear Model at Visit 1. The occupation nursing and Laboratory/administration have higher 2-AG level at Visit 1 than physicians.

Supplement 4b: Linear Model at Visit 3 with Factorized Stress Score

| Predictors                                    | PEA                      |              | OEA                     |        | SEA                     |        | 2-AG                    |              | AEA                     |       |
|-----------------------------------------------|--------------------------|--------------|-------------------------|--------|-------------------------|--------|-------------------------|--------------|-------------------------|-------|
|                                               | Estimates                | p            | Estimates               | p      | Estimates               | p      | Estimates               | p            | Estimates               | p     |
| (Intercept)                                   | 7.62<br>(7.24 – 8.01)    | <0.001       | 7.24<br>(6.76 – 7.72)   | <0.001 | 7.61<br>(7.26 – 7.95)   | <0.001 | 4.88<br>(4.63 – 5.13)   | <0.001       | 0.06<br>(-0.48 – 0.60)  | 0.833 |
| Age-Group: 20 to 29                           | Reference                |              | Reference               |        | Reference               |        | Reference               |              | Reference               |       |
| Age-Group: 30 to 39                           | 0.06<br>(-0.15 – 0.28)   | 0.569        | 0.06<br>(-0.21 – 0.33)  | 0.661  | 0.03<br>(-0.16 – 0.22)  | 0.776  | -0.03<br>(-0.16 – 0.11) | 0.718        | -0.04<br>(-0.35 – 0.27) | 0.791 |
| Age-Group: 40 to 49                           | -0.03<br>(-0.27 – 0.21)  | 0.825        | 0.02<br>(-0.28 – 0.32)  | 0.902  | -0.05<br>(-0.26 – 0.16) | 0.645  | 0.01<br>(-0.15 – 0.16)  | 0.941        | 0.04<br>(-0.33 – 0.40)  | 0.847 |
| Age-Group: 50 to 59                           | 0.09<br>(-0.19 – 0.38)   | 0.522        | 0.13<br>(-0.22 – 0.49)  | 0.464  | 0.00<br>(-0.26 – 0.26)  | 0.978  | 0.06<br>(-0.13 – 0.24)  | 0.547        | 0.01<br>(-0.39 – 0.41)  | 0.959 |
| Age-Group: 60 to 69                           | -0.17<br>(-0.58 – 0.23)  | 0.395        | 0.08<br>(-0.42 – 0.58)  | 0.756  | -0.05<br>(-0.41 – 0.31) | 0.787  | 0.28<br>(0.02 – 0.54)   | <b>0.035</b> | 0.22<br>(-0.45 – 0.89)  | 0.519 |
| Gender: Male                                  | Reference                |              | Reference               |        | Reference               |        | Reference               |              | Reference               |       |
| Gender: Female                                | 0.16<br>(-0.04 – 0.36)   | 0.116        | 0.03<br>(-0.22 – 0.28)  | 0.807  | 0.02<br>(-0.16 – 0.20)  | 0.828  | -0.06<br>(-0.19 – 0.07) | 0.332        | 0.06<br>(-0.25 – 0.37)  | 0.711 |
| Occupation: Physician                         | Reference                |              | Reference               |        | Reference               |        | Reference               |              | Reference               |       |
| Occupation: Administration/Laboratory         | 0.20<br>(-0.07 – 0.47)   | 0.141        | 0.21<br>(-0.13 – 0.54)  | 0.224  | 0.23<br>(-0.01 – 0.47)  | 0.062  | 0.29<br>(0.11 – 0.46)   | <b>0.001</b> | -0.04<br>(-0.42 – 0.35) | 0.845 |
| Occupation: Nursing                           | 0.01<br>(-0.20 – 0.23)   | 0.904        | 0.03<br>(-0.24 – 0.29)  | 0.836  | 0.03<br>(-0.16 – 0.22)  | 0.761  | 0.22<br>(0.08 – 0.36)   | <b>0.002</b> | 0.21<br>(-0.11 – 0.52)  | 0.191 |
| Occupation: Others/Cleaning service           | -0.01<br>(-0.42 – 0.40)  | 0.977        | 0.09<br>(-0.42 – 0.60)  | 0.721  | 0.11<br>(-0.26 – 0.47)  | 0.571  | 0.20<br>(-0.05 – 0.45)  | 0.119        | 0.21<br>(-0.39 – 0.81)  | 0.489 |
| CovidContact: No                              | Reference                |              | Reference               |        | Reference               |        | Reference               |              | Reference               |       |
| CovidContact: Yes                             | 0.10<br>(-0.09 – 0.28)   | 0.296        | 0.08<br>(-0.15 – 0.30)  | 0.517  | 0.16<br>(-0.01 – 0.32)  | 0.062  | 0.12<br>(0.00 – 0.24)   | <b>0.044</b> | -0.11<br>(-0.39 – 0.16) | 0.418 |
| Visit 3 Stress / Anxiety: low stress          | Reference                |              | Reference               |        | Reference               |        | Reference               |              | Reference               |       |
| Visit 3 Stress / Anxiety: Stressed            | -0.26<br>(-0.49 – -0.03) | <b>0.026</b> | -0.17<br>(-0.45 – 0.12) | 0.246  | -0.12<br>(-0.33 – 0.08) | 0.235  | -0.08<br>(-0.23 – 0.07) | 0.304        | 0.01<br>(-0.33 – 0.35)  | 0.963 |
| Visit 3 Adhering rules: Not Changed           | Reference                |              | Reference               |        | Reference               |        | Reference               |              | Reference               |       |
| Visit 3 Adhering rules: Changed               | -0.02<br>(-0.26 – 0.22)  | 0.878        | 0.05<br>(-0.26 – 0.35)  | 0.763  | 0.06<br>(-0.15 – 0.28)  | 0.560  | -0.00<br>(-0.16 – 0.15) | 0.967        | 0.05<br>(-0.29 – 0.40)  | 0.754 |
| Visit 3 Effects of the Pandemic: Not Impacted | Reference                |              | Reference               |        | Reference               |        | Reference               |              | Reference               |       |
| Visit 3 Effects of the Pandemic: Impacted     | 0.68<br>(-0.37 – 1.73)   | 0.203        | 0.95<br>(-0.36 – 2.25)  | 0.153  | 0.40<br>(-0.53 – 1.34)  | 0.396  | -0.17<br>(-0.85 – 0.51) | 0.618        | -0.16<br>(-1.53 – 1.21) | 0.815 |
| Visit 3 Resilience: Low resilience            | Reference                |              | Reference               |        | Reference               |        | Reference               |              | Reference               |       |
| Visit 3 Resilience: Normal resilience         | 0.16<br>(-0.09 – 0.41)   | 0.202        | -0.00<br>(-0.31 – 0.31) | 0.988  | 0.08<br>(-0.14 – 0.30)  | 0.494  | -0.13<br>(-0.30 – 0.03) | 0.108        | 0.05<br>(-0.29 – 0.39)  | 0.769 |
| Visit 3 Resilience: High resilience           | 0.37<br>(0.07 – 0.66)    | <b>0.014</b> | 0.27<br>(-0.09 – 0.64)  | 0.142  | 0.20<br>(-0.06 – 0.46)  | 0.130  | -0.10<br>(-0.29 – 0.09) | 0.317        | 0.27<br>(-0.14 – 0.68)  | 0.190 |
| Observations                                  |                          | 156          |                         | 155    |                         | 155    |                         | 156          |                         | 126   |
| R <sup>2</sup> / R <sup>2</sup> adjusted      | 0.140 / 0.054            |              | 0.079 / -0.013          |        | 0.089 / -0.002          |        | 0.171 / 0.089           |              | 0.071 / -0.047          |       |

Supplement 4: Linear Model at Visit 3. The occupation nursing and Laboratory/administration have higher 2-AG level at Visit 3. There are also higher 2-AG-levels with subjects with COVID-19 contact. Regarding PEA, significantly higher PEA-levels in subjects with higher resilience was seen, while lower PEA-concentrations were quantified in stressed subjects.

Supplement 5: Mixed Model without Hair-related Factors

| Supplement 5: Mixed Model without Hair-related Factors |                         |                  |                         |                  |                         |                  |                       |                  |                         |              |
|--------------------------------------------------------|-------------------------|------------------|-------------------------|------------------|-------------------------|------------------|-----------------------|------------------|-------------------------|--------------|
|                                                        | PEA                     |                  | OEA                     |                  | SEA                     |                  | 2-AG                  |                  | AEA                     |              |
| Predictors                                             | Estimates               | p                | Estimates               | p                | Estimates               | p                | Estimates             | p                | Estimates               | p            |
| (Intercept)                                            | 8.16<br>(7.84 – 8.48)   | <b>&lt;0.001</b> | 7.79<br>(7.33 – 8.25)   | <b>&lt;0.001</b> | 8.07<br>(7.85 – 8.29)   | <b>&lt;0.001</b> | 4.62<br>(4.43 – 4.80) | <b>&lt;0.001</b> | 0.37<br>(0.05 – 0.69)   | <b>0.024</b> |
| Age-Group: 20 to 29                                    | Reference               |                  | Reference               |                  | Reference               |                  | Reference             |                  | Reference               |              |
| Age-Group: 30 to 39                                    | 0.06<br>(-0.19–0.32)    | 0.626            | 0.07<br>(-0.29–0.43)    | 0.713            | 0.01<br>(-0.16–0.17)    | 0.945            | -0.08<br>(-0.22–0.07) | 0.297            | -0.10<br>(-0.34–0.14)   | 0.403        |
| Age-Group: 40 to 49                                    | -0.05<br>(-0.34–0.23)   | 0.721            | -0.11<br>(-0.52–0.30)   | 0.589            | -0.12<br>(-0.31–0.07)   | 0.225            | -0.09<br>(-0.25–0.08) | 0.303            | 0.09<br>(-0.19–0.38)    | 0.525        |
| Age-Group: 50 to 59                                    | -0.02<br>(-0.33–0.30)   | 0.904            | -0.07<br>(-0.53–0.38)   | 0.750            | -0.04<br>(-0.25–0.17)   | 0.722            | -0.08<br>(-0.26–0.10) | 0.379            | -0.07<br>(-0.37–0.23)   | 0.641        |
| Age-Group: 60 to 69                                    | -0.29<br>(-0.73–0.16)   | 0.206            | -0.36<br>(-1.00–0.28)   | 0.275            | -0.12<br>(-0.42–0.17)   | 0.411            | 0.18<br>(-0.08–0.43)  | 0.173            | 0.07<br>(-0.37–0.50)    | 0.756        |
| Gender: Male                                           | Reference               |                  | Reference               |                  | Reference               |                  | Reference             |                  | Reference               |              |
| Gender: Female                                         | 0.04<br>(-0.19–0.28)    | 0.729            | 0.13<br>(-0.21–0.46)    | 0.455            | -0.04<br>(-0.20–0.11)   | 0.593            | 0.01<br>(-0.12–0.15)  | 0.838            | 0.06<br>(-0.18–0.29)    | 0.639        |
| Occupation: Physician                                  | Reference               |                  | Reference               |                  | Reference               |                  | Reference             |                  | Reference               |              |
| Occupation: Administration/Laboratory                  | 0.21<br>(-0.11–0.53)    | 0.192            | 0.19<br>(-0.26–0.65)    | 0.408            | 0.13<br>(-0.08–0.35)    | 0.231            | 0.20<br>(0.01–0.39)   | <b>0.037</b>     | 0.00<br>(-0.31–0.31)    | 0.997        |
| Occupation: Nursing                                    | 0.05<br>(-0.20–0.31)    | 0.671            | -0.08<br>(-0.44–0.27)   | 0.640            | -0.00<br>(-0.17–0.16)   | 0.995            | 0.16<br>(0.02–0.30)   | <b>0.027</b>     | 0.31<br>(0.07–0.55)     | <b>0.013</b> |
| Occupation: Others/Cleaning service                    | -0.01<br>(-0.49–0.46)   | 0.951            | -0.12<br>(-0.80–0.55)   | 0.719            | -0.02<br>(-0.33–0.29)   | 0.905            | 0.21<br>(-0.04–0.47)  | 0.103            | -0.04<br>(-0.49–0.42)   | 0.876        |
| CovidContact: No                                       | Reference               |                  | Reference               |                  | Reference               |                  | Reference             |                  | Reference               |              |
| CovidContact: Yes                                      | 0.11<br>(-0.10–0.33)    | 0.297            | 0.15<br>(-0.15–0.46)    | 0.328            | 0.07<br>(-0.07–0.21)    | 0.337            | 0.17<br>(0.05–0.29)   | <b>0.005</b>     | -0.04<br>(-0.25–0.16)   | 0.690        |
| Seroconversion: No                                     | Reference               |                  | Reference               |                  | Reference               |                  | Reference             |                  | Reference               |              |
| Seroconversion: Yes                                    | -0.12<br>(-0.53–0.29)   | 0.561            | -0.12<br>(-0.71–0.46)   | 0.685            | -0.18<br>(-0.46–0.09)   | 0.184            | -0.16<br>(-0.40–0.07) | 0.168            | 0.04<br>(-0.36–0.45)    | 0.832        |
| Time                                                   | -0.06<br>(-0.07– -0.04) | <b>&lt;0.001</b> | -0.07<br>(-0.09– -0.06) | <b>&lt;0.001</b> | -0.03<br>(-0.05– -0.02) | <b>&lt;0.001</b> | 0.03<br>(0.01–0.04)   | <b>&lt;0.001</b> | -0.04<br>(-0.06– -0.02) | <b>0.001</b> |
| <b>Random Effects</b>                                  |                         |                  |                         |                  |                         |                  |                       |                  |                         |              |
| $\sigma^2$                                             | 0.08                    |                  | 0.13                    |                  | 0.10                    |                  | 0.07                  |                  | 0.15                    |              |
| $\tau_{00}$                                            | 0.39 Subject            |                  | 0.81 Subject            |                  | 0.16 Subject            |                  | 0.12 Subject          |                  | 0.29 Subject            |              |
| ICC                                                    | 0.84                    |                  | 0.86                    |                  | 0.61                    |                  | 0.64                  |                  | 0.66                    |              |
| N                                                      | 171 Subject             |                  | 174 Subject             |                  | 171 Subject             |                  | 174 Subject           |                  | 153 Subject             |              |
| Observations                                           | 823                     |                  | 837                     |                  | 822                     |                  | 832                   |                  | 638                     |              |
| Marginal R <sup>2</sup> / Conditional R <sup>2</sup>   | 0.042 / 0.843           |                  | 0.038 / 0.867           |                  | 0.037 / 0.624           |                  | 0.100 / 0.680         |                  | 0.086 / 0.689           |              |

Supplement 5: Mixed Model without hair related factors over the whole time period

A significant higher concentration of 2-AG in nurses and administration/laboratory workers was quantified. The decrease of PEA, OEA, SEA and AEA and an increase of 2-AG over the time-period was significant.

Supplement 6: Linear Model of cortisone at Visit 1 (6a) and Visit 3 (6b) with Factorized Stress Score

| Supplement 6a: Linear Model of Cortisone at Visit 1 with Factorized Stress Score |                           |              |
|----------------------------------------------------------------------------------|---------------------------|--------------|
|                                                                                  | Cortisone                 |              |
| Predictors                                                                       | Estimates                 | p            |
| (Intercept)                                                                      | 16.00<br>(-16.53 – 48.52) | 0.332        |
| Age-Group: 20 to 29                                                              | Reference                 |              |
| Age-Group: 30 to 39                                                              | -2.94<br>(-10.08 – 4.19)  | 0.415        |
| Age-Group: 40 to 49                                                              | 3.56<br>(-4.39 – 11.52)   | 0.376        |
| Age-Group: 50 to 59                                                              | -0.58<br>(-9.29 – 8.13)   | 0.894        |
| Age-Group: 60 to 69                                                              | -0.58<br>(-14.73 – 13.58) | 0.936        |
| Gender: Male                                                                     | Reference                 |              |
| Gender: Female                                                                   | -5.33<br>(-12.21 – 1.54)  | 0.127        |
| Occupation: Physician                                                            | Reference                 |              |
| Occupation: Administration/Laboratory                                            | 1.00<br>(-7.97 – 9.96)    | 0.826        |
| Occupation: Nursing                                                              | 9.50<br>(2.31 – 16.70)    | <b>0.010</b> |
| Occupation: Others/Cleaning service                                              | -5.02<br>(-21.06 – 11.02) | 0.536        |
| CovidContact: No                                                                 | Reference                 |              |
| CovidContact: Yes                                                                | -4.53<br>(-10.66 – 1.61)  | 0.146        |
| Seroconversion: No                                                               | Reference                 |              |
| Seroconversion: Yes                                                              | 0.38<br>(-17.48 – 18.23)  | 0.967        |
| Block I: Stress / Anxiety: Not Stressed                                          | Reference                 |              |
| Block I: Stress / Anxiety: Stressed                                              | 4.44<br>(-1.83 – 10.71)   | 0.163        |
| Block II: Adhering Rules: Not Changed                                            | Reference                 |              |
| Block II: Adhering Rules: Changed                                                | 13.02<br>(-16.49 – 42.53) | 0.383        |
| Block III: Effects of the Pandemic: Not Impacted                                 | Reference                 |              |
| Block III: Effects of the Pandemic: Impacted                                     | -7.43<br>(-19.90 – 5.03)  | 0.239        |
| Block IV: Resilience: Low resilience                                             | Reference                 |              |
| Block IV: Resilience: Normal resilience                                          | 0.25<br>(-8.64 – 9.13)    | 0.956        |
| Block IV: Resilience: High resilience                                            | -3.21<br>(-13.71 – 7.29)  | 0.545        |
| Observations                                                                     | 116                       |              |
| R <sup>2</sup> / R <sup>2</sup> adjusted                                         | 0.176 / 0.052             |              |

| Supplement 6b: Linear Model of Cortisone at Visit 3 with Factorized Stress Score |                            |                  |
|----------------------------------------------------------------------------------|----------------------------|------------------|
|                                                                                  | Cortisone                  |                  |
| Predictors                                                                       | Estimates                  | p                |
| (Intercept)                                                                      | 43.26<br>(29.65 – 56.87)   | <b>&lt;0.001</b> |
| Age-Group: 20 to 29                                                              | Reference                  |                  |
| Age-Group: 30 to 39                                                              | -1.49<br>(-9.24 – 6.26)    | 0.704            |
| Age-Group: 40 to 49                                                              | 8.92<br>(0.46 – 17.38)     | <b>0.039</b>     |
| Age-Group: 50 to 59                                                              | 6.15<br>(-3.91 – 16.21)    | 0.229            |
| Age-Group: 60 to 69                                                              | 3.48<br>(-12.34 – 19.29)   | 0.664            |
| Gender: Male                                                                     | Reference                  |                  |
| Gender: Female                                                                   | -9.09<br>(-16.33 – -1.85)  | <b>0.014</b>     |
| Occupation: Physician                                                            | Reference                  |                  |
| Occupation: Administration/Laboratory                                            | 8.01<br>(-1.79 – 17.81)    | 0.108            |
| Occupation: Nursing                                                              | 10.82<br>(3.01 – 18.64)    | <b>0.007</b>     |
| Occupation: Others/Cleaning service                                              | 6.12<br>(-9.92 – 22.15)    | 0.452            |
| CovidContact: No                                                                 | Reference                  |                  |
| CovidContact: Yes                                                                | 1.33<br>(-5.27 – 7.93)     | 0.691            |
| Seroconversion: No                                                               | Reference                  |                  |
| Seroconversion: Yes                                                              | 4.21<br>(-9.41 – 17.83)    | 0.542            |
| Block I: Stress / Anxiety: Not Stressed                                          | Reference                  |                  |
| Block I: Stress / Anxiety: Stressed                                              | 5.08<br>(-3.02 – 13.17)    | 0.217            |
| Block II: Adhering Rules: Not Changed                                            | Reference                  |                  |
| Block II: Adhering Rules: Changed                                                | -3.91<br>(-12.37 – 4.54)   | 0.362            |
| Block III: Effects of the Pandemic: Not Impacted                                 | Reference                  |                  |
| Block III: Effects of the Pandemic: Impacted                                     | -13.46<br>(-49.58 – 22.67) | 0.462            |
| Block IV: Resilience: Low resilience                                             | Reference                  |                  |
| Block IV: Resilience: Normal resilience                                          | -7.43<br>(-16.09 – 1.23)   | 0.092            |
| Block IV: Resilience: High resilience                                            | -7.41<br>(-17.72 – 2.91)   | 0.158            |
| Observations                                                                     | 148                        |                  |
| R <sup>2</sup> / R <sup>2</sup> adjusted                                         | 0.137 / 0.039              |                  |

Supplement 6: Linear Model of cortisone at Visit 1 (6a) and Visit 3 (6b) with Factorized Stress Score At both visits, nurses had higher cortisone levels than physicians. At Visit 3 significant higher cortisone level in the age group 40-49 than in the age group 20-29 and significant lower cortisone level in female were observed.
